# Supplementary material for: Molecular Screening of Microorganisms Associated with Discolored Wood in Dead European Beech Trees Suffered from Extreme Drought Event Using Next Generation Sequencing
Source: MDPI journal article supplement (doi:10.3390/plants10102092), 2021-10-02
Supplement: s1 [file s1]

## **Supplementary Information**

### **Molecular screening of microorganisms associated with discolored wood in dead European beech trees suffered from extreme drought event using Next Generation Sequencing**

**Witoon Purahong<sup>1\*</sup>, Benjawan Tanunchai<sup>1</sup>, Sara Fareed Mohamed Wahdan<sup>1, 2</sup>, François Buscot<sup>1,3</sup>, Ernst-Detlef Schulze<sup>4</sup>**

#### **Affiliations:**

<sup>1</sup>UFZ-Helmholtz Centre for Environmental Research, Department of Soil Ecology, Theodor-Lieser-Str. 4, D-06120 Halle (Saale), Germany

<sup>2</sup>Botany Department, Faculty of Science, Suez Canal University, 41522 Ismailia, Egypt

<sup>3</sup>German Centre for Integrative Biodiversity Research (iDiv) Halle - Jena - Leipzig, Deutscher Platz 5e, D - 04103 Leipzig, Germany

<sup>4</sup>Max Planck Institute for Biogeochemistry, Hans-Knöll-Str. 10, D-07745 Jena, Germany

\*Correspondence and requests for materials should be addressed to Witoon Purahong (Tel: 0345 558 5207, e-mail: witoon.purahong@ufz.de).

**Fig. S1** Wood samples used in this study and characteristics of discolored and non-discolored wood samples. Wood samples were frozen at -80 °C, thus colour of discolored wood appears more subtle and less intense as compared with fresh samples.

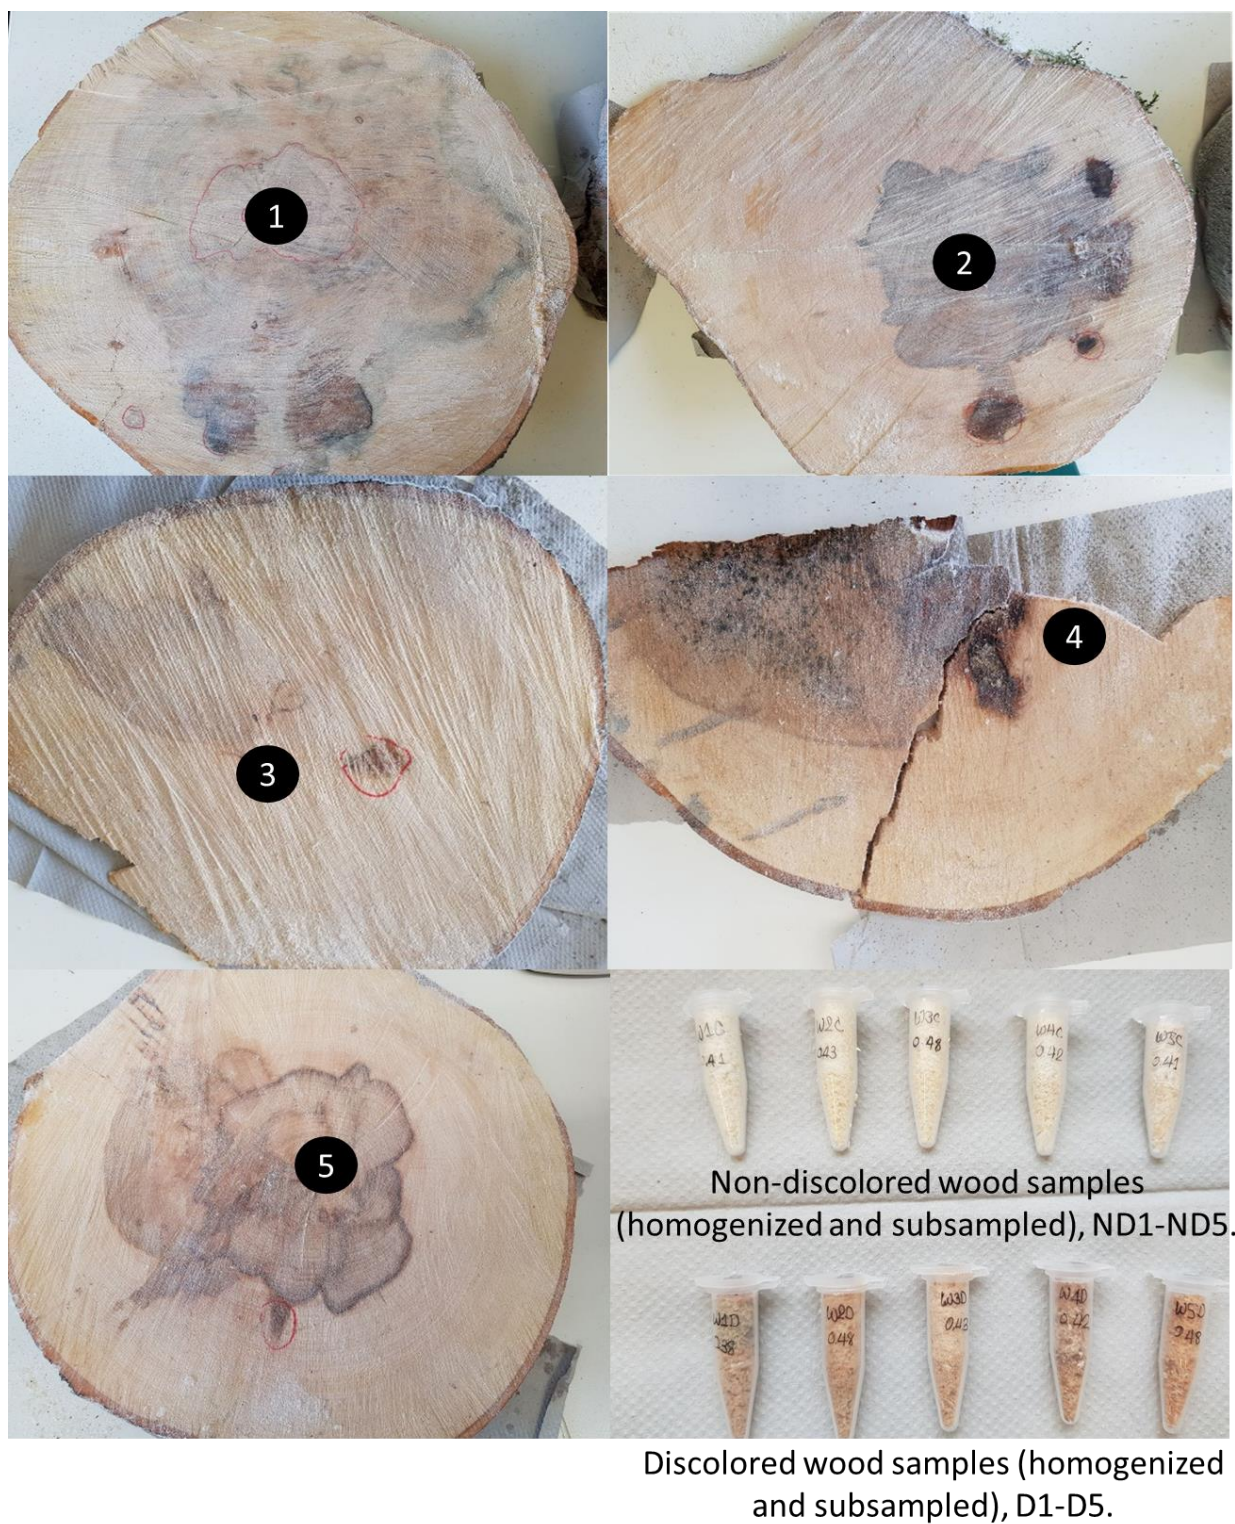

**Fig. S2** Rarefaction curves of non-discolored (ND) wood samples.

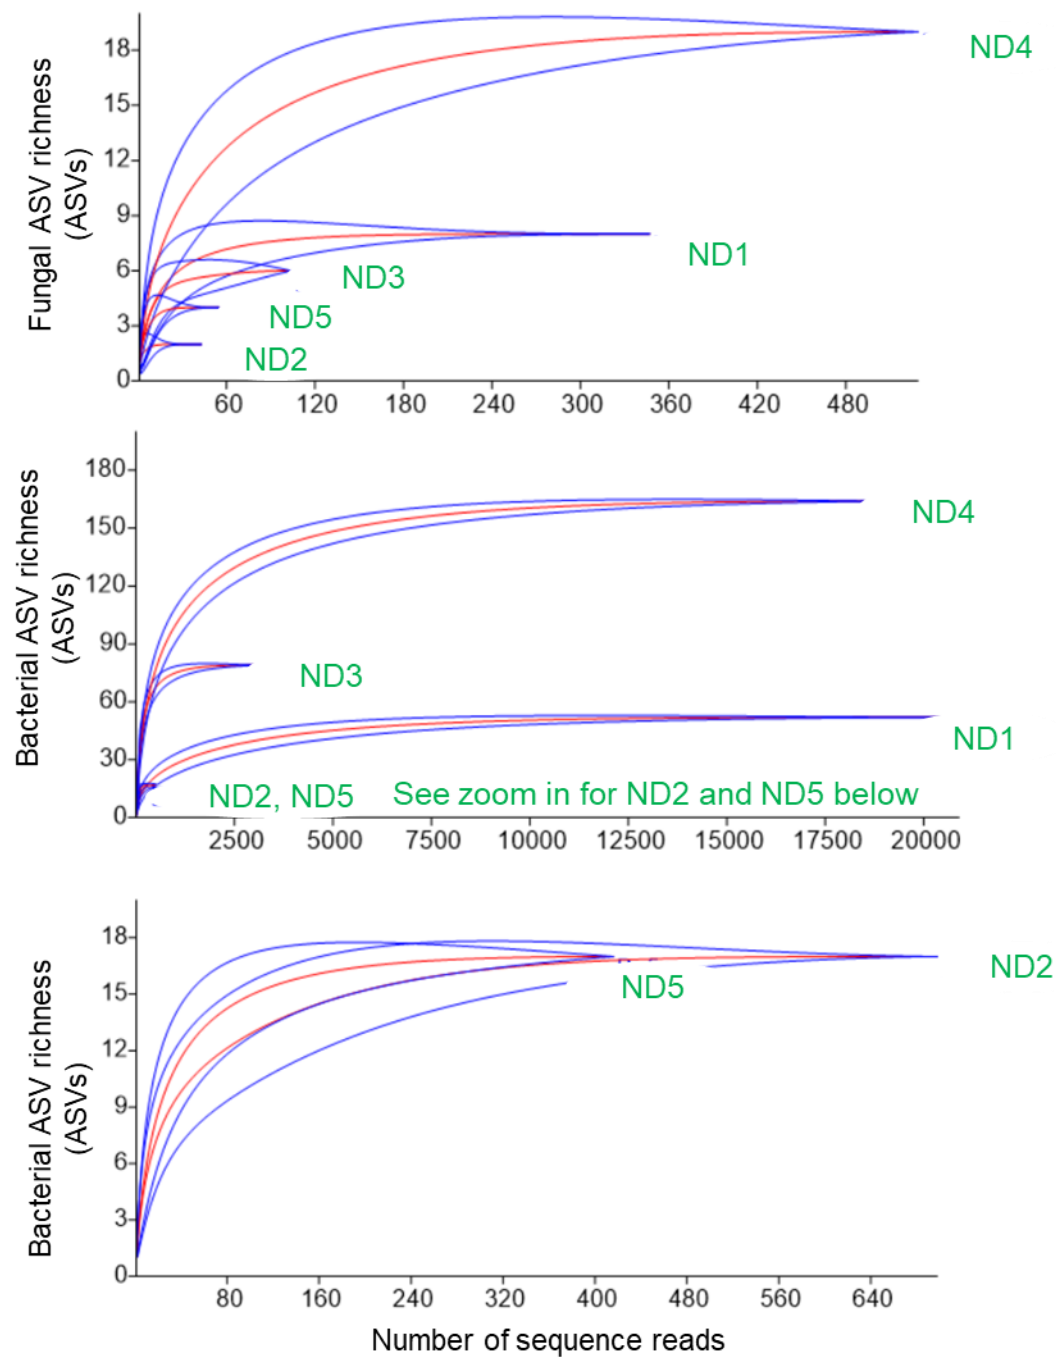

**Table S1.** Taxonomic and abundance (sequence reads) of all fungal ASV detected in discolored and non-discolored beech wood samples.

**Table S2.** Taxonomic and abundance (sequence reads) of all bacterial ASV detected in discolored and non-discolored beech wood samples.

**Table S3.** UNITE species hypotheses of the top 20 fungal ASVs with highest relative abundances detected in discolored wood areas (D) of European beech stumps located in Thüringen forest.
